# Supplementary material
Source: publisher figshare collection journal article supplement (https://acs.figshare.com/ndownloader/files/9129307)
Supplement: Supplementary file 1 [file 9129307]

Compound	SMILES	Percent Residual Activity of AEP	AEP IC50 (uM)	Cathepsin-S (uM)	Cathepsin-L (uM)	Caspase-3 (uM)	Caspase-8 (uM)
38	c1cc(Cl)ccc1OCC(O)Cn2c(S)nc(c23)n(C)c(=O)[nH]c3=O	14.00%	0.37 +/-0.06	>200	>200	29.7 +/- 4.7	76.1 +/- 8.1
38a	Cn1c(S)nc(c12)n(C)c(=O)[nH]c2=O	11.50%
38b	CCn1c(S)nc(c12)n(C)c(=O)[nH]c2=O	13.80%
38c	CCCn1c(S)nc(c12)n(C)c(=O)[nH]c2=O	14.90%
38d	CCCCn1c(S)nc(c12)n(C)c(=O)[nH]c2=O	14.80%
38e	CC(C)Cn1c(S)nc(c12)n(C)c(=O)[nH]c2=O	15.70%
38f	CC[C@H](C)n1c(S)nc(c12)n(C)c(=O)[nH]c2=O	14.10%
38g	COCCn1c(S)nc(c12)n(C)c(=O)[nH]c2=O	13.80%
38h	OC[C@@H](O)Cn1c(S)nc(c12)n(C)c(=O)[nH]c2=O	85.40%
38i	CC(=O)Cn1c(S)nc(c12)n(C)c(=O)[nH]c2=O	69.40%
38j	c1cc(C)ccc1Cn2c(S)nc(c23)n(C)c(=O)[nH]c3=O	12.30%
38k	c1ccccc1OC[C@@H](O)Cn2c(S)nc(c23)n(C)c(=O)[nH]c3=O	34.60%
38l	COc(cc1)ccc1OC[C@@H](O)Cn2c(S)nc(c23)n(C)c(=O)[nH]c3=O	18.50%
38m	c1nc(C)nc(c12)n(C)c(=O)[nH]c2=O	91.90%
38o	Cn1cnc(c12)n(C)c(=O)n(C)c2=O	74.30%
38p	Cn1c(S)nc(c12)n(C)c(=O)n(C)c2=O	16.10%	0.18 +/- 0.01	>200	80.5 +/- 0.2	184.7 +/- 1.2	>200
38q	CCn1c(S)nc(c12)n(C)c(=O)n(C)c2=O	15.90%
38r	CC(C)n1c(S)nc(c12)n(C)c(=O)n(C)c2=O	17.80%
38s	C=CCn1c(S)nc(c12)n(C)c(=O)n(C)c2=O	18.10%
38t	c1cc(C)ccc1Cn2c(S)nc(c23)n(C)c(=O)n(C)c3=O	17.20%
38u	CCn(c1=O)c(=O)n(C)c(c12)nc(S)n2C	17.60%	0.16+/- 0.02	>200	162.1+/- 0.3	>200	>200
38v	c1ccccc1Cn(c2=O)c(=O)n(C)c(c23)nc(S)n3C	17.70%	0.17 +/- 0.01	>200	>200	>200	>200
38w	c1ccccc1Cn2c(S)nc(c23)n(C)c(=O)n(c3=O)Cc4ccccc4	17.20%
38x	Cn1c(SC)nc(c12)n(C)c(=O)n(C)c2=O	70.50%
38y	O=c1n(C)c(=O)n(C)c(c12)nc(n2C)Sc3nccn3C	100.00%
38z	Cn1c(S(=O)(=O)C)nc(c12)n(C)c(=O)n(C)c2=O	98.30%
38aa	O=c1n(C)c(=O)n(C)c(c12)nc(n2C)S(=O)(=O)c3ccccc3	98.90%
